# Supplementary material for: Adherence to Mediterranean Diet and Food Neophobia Occurrence in Children: A Study Carried out in Italy
Source: MDPI journal article supplement (doi:10.3390/nu15245078), 2023-12-12
Supplement: s1 [file s1]

# Supplementary Materials: Table S1 - The Questionnaire

| Questions                                                                  | Answers                                                                                                                                                                    |
|----------------------------------------------------------------------------|----------------------------------------------------------------------------------------------------------------------------------------------------------------------------|
| PERSONAL DATA                                                              |                                                                                                                                                                            |
| Gender                                                                     | Male/Female                                                                                                                                                                |
| Age (years)                                                                | Age in years                                                                                                                                                               |
| Weight                                                                     | kg                                                                                                                                                                         |
| Height                                                                     | cm                                                                                                                                                                         |
| School attended by the child                                               | Nursery/Primary school                                                                                                                                                     |
| Ethnic group                                                               | African/Asiatic/Caucasian/Eurasian/Hispanic                                                                                                                                |
| Household income                                                           | Up to 10.000 euros/Between 10.001 and 25.000 euros/Between 25.001 and 40.000 euros/Between 40.001 and more                                                                 |
| Parents employment                                                         | Both parents employed/≤1 parent employed                                                                                                                                   |
| Children in family                                                         | Number in units                                                                                                                                                            |
| SECTION 1 (S1) - CHILD FOOD NEOPHOBIA SCALE (CFNS)                         |                                                                                                                                                                            |
| S1.1 The child constantly sampling new and different food                  | For each question, choose one of the following options:<br><br>Strongly disagree/Disagree/Somewhat disagree/Neither agree nor disagree/Somewhat agree/Agree/Strongly agree |
| S1.2 The child doesn't trust new foods                                     |                                                                                                                                                                            |
| S1.3 If the child does not know what a kind of food is, he does not try it |                                                                                                                                                                            |
| S1.4 The child likes food from different cultures                          |                                                                                                                                                                            |
| S1.5 Ethnic food looks to him/her too weird to eat                         |                                                                                                                                                                            |
| S1.6 During a party the child is willing to try new foods                  |                                                                                                                                                                            |
| S1.7 The child is afraid to eat things he has never had before             |                                                                                                                                                                            |
| S1.8 The child is very particular about the food he/she eats               |                                                                                                                                                                            |
| S1.9 The child will eat almost anything                                    |                                                                                                                                                                            |
| S1.10 The child likes to try new ethnic restaurants                        |                                                                                                                                                                            |
| SECTION 2 (S2) - KIDMED TEST                                               |                                                                                                                                                                            |
| S2.1 Takes a fruit or fruit juice every day                                | Yes/No                                                                                                                                                                     |
| S2.2 Has a second fruit every day                                          |                                                                                                                                                                            |
| S2.3 Has fresh or cooked vegetables regularly once a day                   |                                                                                                                                                                            |
| S2.4 Has fresh or cooked vegetables more than once a day                   |                                                                                                                                                                            |
| S2.5 Consumes fish regularly (at least 2–3 times per week)                 |                                                                                                                                                                            |
| S2.6 Goes more than once a week to a fast-food (hamburger) restaurant      |                                                                                                                                                                            |
| S2.7 Likes pulses and eats them more than once a week                      |                                                                                                                                                                            |
| S2.8 Consumes pasta or rice almost every day (5 or more times per week)    |                                                                                                                                                                            |
| S2.9 Has cereals or grains (bread, etc.) for breakfast                     |                                                                                                                                                                            |
| S2.10 Consumes nuts regularly (at least 2–3 times per week)                |                                                                                                                                                                            |
| S2.11 Uses olive oil at home                                               |                                                                                                                                                                            |
| S2.12 Skips breakfast                                                      |                                                                                                                                                                            |
| S2.13 Has a dairy product for breakfast (yoghurt, milk, etc.)              |                                                                                                                                                                            |
| S2.14 Has commercially baked goods or pastries for breakfast               |                                                                                                                                                                            |
| S2.15 Takes two yoghurts and/or some cheese (40 g) daily                   |                                                                                                                                                                            |
| S2.16 Takes sweets and candy several times every day                       |                                                                                                                                                                            |

**Supplementary Materials: Table S2 - Results of the KIDMED Test**

|                                                           |     | <b>n</b> | <b>%</b> |
|-----------------------------------------------------------|-----|----------|----------|
| <b>Fruit or fruit juice every day</b>                     | Yes | 229      | 79.5     |
|                                                           | No  | 59       | 20.5     |
| <b>Second fruit every day</b>                             | Yes | 110      | 38.2     |
|                                                           | No  | 178      | 61.8     |
| <b>Fresh or cooked vegetables regularly once a day</b>    | Yes | 92       | 31.9     |
|                                                           | No  | 196      | 68.1     |
| <b>Fresh or cooked vegetables more than once a day</b>    | Yes | 77       | 26.7     |
|                                                           | No  | 211      | 73.3     |
| <b>Fish at least 2-3 times per week</b>                   | Yes | 188      | 65.3     |
|                                                           | No  | 100      | 34.7     |
| <b>Fast-food more than once a week</b>                    | Yes | 54       | 18.8     |
|                                                           | No  | 234      | 81.2     |
| <b>Legumes more than once a week</b>                      | Yes | 133      | 46.2     |
|                                                           | No  | 155      | 53.8     |
| <b>Pasta or rice 5 or more times per week</b>             | Yes | 90       | 31.3     |
|                                                           | No  | 198      | 68.7     |
| <b>Cereals or grains (bread, etc.) for breakfast</b>      | Yes | 54       | 18.8     |
|                                                           | No  | 234      | 81.2     |
| <b>Nuts at least 2–3 times per week</b>                   | Yes | 73       | 25.3     |
|                                                           | No  | 215      | 74.7     |
| <b>Olive oil as seasoning</b>                             | Yes | 276      | 95.8     |
|                                                           | No  | 12       | 4.2      |
| <b>Skips breakfast</b>                                    | Yes | 34       | 11.8     |
|                                                           | No  | 254      | 88.2     |
| <b>Dairy product for breakfast (yoghurt, milk, etc.)</b>  | Yes | 264      | 91.7     |
|                                                           | No  | 24       | 8.3      |
| <b>Commercially baked goods or pastries for breakfast</b> | Yes | 235      | 81.6     |
|                                                           | No  | 53       | 18.4     |
| <b>Two yoghurts and/or some cheese (40 g) daily</b>       | Yes | 171      | 59.4     |
|                                                           | No  | 117      | 40.6     |
| <b>Sweets and candy several times every day</b>           | Yes | 115      | 39.9     |
|                                                           | No  | 173      | 60.1     |
